# Supplementary material for: Cloning, Expression and Characterization of UDP-Glucose Dehydrogenases
Source: MDPI journal article supplement (doi:10.3390/life11111201), 2021-11-07
Supplement: s1 [file s1]

# **Cloning, Expression and Characterization of UDP-glucose Dehydrogenases**

Márcia R Couto, Joana L Rodrigues\* and Lígia R Rodrigues

Centre of Biological Engineering, University of Minho, Braga 4710-057, Portugal

\*Corresponding author: joanarodrigues@ceb.uminho.pt

## **Supplementary Information**

**Table S1.** Primers used in this study for gene amplification, colony PCR and sequencing. Histidine Tag sequence is underlined.

| Primers                               | Template                            | Sequence (5' → 3')                                     | Restriction enzyme |
|---------------------------------------|-------------------------------------|--------------------------------------------------------|--------------------|
| <i>Gene amplification for cloning</i> |                                     |                                                        |                    |
| Zm_Fw                                 | <i>Zymomonas mobilis</i> gDNA       | AAAGGATCCAAAAAATG <u>CATCACCATCACCATC</u> ACCGCATTACCA | <i>Bam</i> HI      |
| Zm_Rv                                 |                                     | TGATCGGTTCC                                            |                    |
| Lbj_Fw                                | <i>Lactobacillus johnsonii</i> gDNA | AAAGGATCCAAAAAATG <u>CATCACCATCACCATC</u> ACAATTCATATA | <i>Bam</i> HI      |
| Lbj_Rv                                |                                     | AAATTGCAGTTG                                           |                    |
| Zm_prsf_Fw                            | p426GPD_ZmUGD                       | AAAGGATCCAAAAAATG <u>CATCACCATCACCATC</u> ACTTTGAGATTA | <i>Eco</i> RI      |
| Zm_prsf_Rv                            |                                     | AAAAAATCTGC                                            |                    |
| Lbj_prsf_Fw                           | pGEM_LbjUGD                         | AAAGGATCCAAAAAATG <u>CATCACCATCACCATC</u> ACTTTGAGATTA | <i>Eco</i> RI      |
| Lbj_prsf_Rv                           |                                     | AAAAAATCTGC                                            |                    |
| Ch_Fw                                 | pUC19_ChUGD                         | AAAGGATCCAAAAAATG <u>CATCACCATCACCATC</u> ACTTTGAGATTA | <i>Bam</i> HI      |
| Ch_Rv                                 |                                     | AAAAAATCTGC                                            |                    |
| <i>Colony PCR and Sequencing</i>      |                                     |                                                        |                    |
| M13_Fw                                | pGEM®-T Easy and derivatives        | GTAAAACGACGGCCAGT                                      |                    |
| M13_Rv                                |                                     | GCGGATAACAATTTCACACAGG                                 |                    |
| pRSFDuet_Fw                           | pRSFDuet-1 and derivatives          | GGATCTCGACGCTCTCCCTT                                   |                    |
| T7 terminator_Rv                      |                                     | CTAGTTATTGCTCAGCGGT                                    |                    |
| PGK1p_Fw                              | pSP-GM1 and derivatives             | GTGATCTCCAGAGCAAAGT                                    |                    |
| CYCt_Rv                               |                                     | CTTCGAGCGTCCCAAAC                                      |                    |
| p426seq_Fw                            | p426GPD and derivatives             | ACTAAAGGGAACAAAAGCTG                                   |                    |
| CYC 1_Rv                              |                                     | ACTTCAGGTTGTCTAACTCC                                   |                    |

**Table S2.** Gene sequence of UGD from *Capra hircus* codon optimized (NZYTech) for *Saccharomyces cerevisiae*

| >ugd1 (UDP-glucose 6-dehydrogenase) from <i>C. hircus</i> (1485 bp; GC%: 41.89; CAI: 0.74)                                                                                                                                                                                                                                                                                                                                                                                                                                                                                                                                                                                                                                                                                                                                                                                                                                                                                                                                                                                                                                                                                                                                                                                                                                                                                                                                                                                                                                                                                                                                                        |
|---------------------------------------------------------------------------------------------------------------------------------------------------------------------------------------------------------------------------------------------------------------------------------------------------------------------------------------------------------------------------------------------------------------------------------------------------------------------------------------------------------------------------------------------------------------------------------------------------------------------------------------------------------------------------------------------------------------------------------------------------------------------------------------------------------------------------------------------------------------------------------------------------------------------------------------------------------------------------------------------------------------------------------------------------------------------------------------------------------------------------------------------------------------------------------------------------------------------------------------------------------------------------------------------------------------------------------------------------------------------------------------------------------------------------------------------------------------------------------------------------------------------------------------------------------------------------------------------------------------------------------------------------|
| ATGTTTGAGATTAAAAAATCTGCTGCATCGGTGCGGGTTATGTCGGTGGTCCTACTTGT<br>AGCGTTATTGCACACATGTGTCCTGAAATTCGTGTCACCGTCGTTGACATCAATGAGTCA<br>AGAATAAATGCTTGGAATAGTCCGACTCTACCAATTTATGAACCCGGTTTGAAAGAAGT<br>AGTTGAATCTTGACAGAGGTAAGAAGTTGTTTTTCTCTACAAACATCGACGACGCGATAAA<br>GGAAGCTGATCTGGTATTCATCTCTGTTAATACACCCACCAAAACGTACGGTATGGGCAA<br>GGGTAGAGCTGCTGATCTAAAGTACATCGAAGCGTGTGCACGTCTGAATAGTTCAGAACT<br>CTCATGGTTACAAGATCGTGACAGAAAAGTCCACAGTTCCAGTTAGAGCAGCTGAATCC<br>ATAAGGAGGATCTTCGATGCTAACACAAAGCCAAACTTGAAGTTACAGGTATTGTCAAA<br>CCCGGAATTTTGTAGCTGAAGGGACGGCCATCAAGGATTTGAAGAACCCAGACCGAGTTC<br>TAATCGGTGGTGACGAGACACCTGAAGGTCAAAGAGCTGTCCAAGCTCTCTGTGCAGTTT<br>ACGAGCATTGGGTGCCCCGTGAAAAAATTCTTACAACCAACACTTGGTCTTCAGAGTTGT<br>CGAAACTAACCGCTAATGCATTTTGTAGCTCAAAGAATTTCTAGCATCAATTCAATTAGTG<br>CCTTGTGTGAAGCAACCGGCGCAGATGTAGAGGAAGTCGCTACAGCTATTGGAATGGAT<br>CAAAGAATAGGTTCTAAATTTCTAAAAGCTAGCGTAGGATTTGGTGGTTCTTGCTTTCAA<br>AAGGATGTCCTTAATTTAGTGTATTTGTGTGAAGCCCTTAATTTACCAGAAGTCGCTAGAT<br>ACTGGCAACAGGTCATAGATATGAACGACTATCAACGTAGAAGATTTCGCTTCGAGGATA<br>ATTGATTCTCTATTTAACACAGTTACTGATAAAAAGATTGCCATATTGGGATTTCGCCTTTA<br>AGAAAGACACTGGCGACACAAGAGAGTCATCATCAATATACATTTCTAAGTATTTGATG<br>GATGAAGGTGCTCACTTGCATATTTATGATCCAAAGGTGCCACGTGAACAGATTGTGGTA<br>GATTTATCGCATCCCGGCGTTAGCAAGGATGATCAAGTTGCTCGTCTTGTGACAATCTCC<br>AAAGACCCATACGAAGCATGTGATGGTGCTCACGCAGTGGTTATTTGTACAGAATGGGA<br>CATGTTTAAAGAACTGGATTACGAGAGAATACACAAAAAATGTTGAAGCCCGCTTTTA<br>TTTTTGATGGTAGGAGAGTGTTGGACGGGCTACATAACGAATTGCAAACCATAGGCTTTC<br>AAATTGAGACAATTGGGAAGAAGGTTTCCAGTAAAAGAATCCCTTATGCGCCGTCAGGG<br>GAGATACCAAAGTTTAGTCTACAAGACATGCCGAATAAGAAACCGAGAGTATAG |

**Table S3.** Results of blastp sequences search against UniProtKB/Swiss-Prot database ordered by the identity percentages obtained. Results with score <50 were removed to exclude enzymes that showed similarity with only one of the protein domains

| Query | Organism                                                 | Protein                | Access Number            | Identity (%) |
|-------|----------------------------------------------------------|------------------------|--------------------------|--------------|
| ZmUGD | <i>Sinorhizobium meliloti</i> 1021                       | UGD                    | <a href="#">O54068.2</a> | 67.05        |
|       | <i>Bacillus subtilis</i> subsp. <i>subtilis</i> str. 168 | UGD (YwqF)             | <a href="#">P96718.1</a> | 48.51        |
|       | <i>Bacillus subtilis</i> subsp. <i>subtilis</i> str. 168 | UGD (TuaD)             | <a href="#">O32271.1</a> | 46.67        |
|       | <i>Pseudomonas aeruginosa</i> PAO1                       | UGD                    | <a href="#">O86422.2</a> | 45.86        |
|       | <i>Rickettsia bellii</i> RML369-C                        | UGD                    | <a href="#">Q1RKf8.1</a> | 44.93        |
|       | <i>Methanocaldococcus jannaschii</i> DSM 2661            | UGD                    | <a href="#">Q58454.1</a> | 44.04        |
|       | <i>Rickettsia conorii</i> str. Malish 7                  | UGD                    | <a href="#">Q92GB1.1</a> | 44.01        |
|       | <i>Rickettsia felis</i> URRWXCα2                         | UGD                    | <a href="#">Q4UK39.1</a> | 43.91        |
|       | <i>Rickettsia typhi</i> str. Wilmington                  | UGD                    | <a href="#">Q68VX0.1</a> | 43.78        |
|       | <i>Rickettsia prowazekii</i> str. Madrid E               | UGD                    | <a href="#">O05973.1</a> | 43.09        |
|       | <i>Bacillus subtilis</i> subsp. <i>subtilis</i> str. 168 | Putative<br>UGD (YtcA) | <a href="#">O34862.1</a> | 40.50        |
|       | <i>Haloferax volcanii</i> DS2                            | UGD (AglM)             | <a href="#">D4GYH5.1</a> | 39.00        |
|       | <i>Drosophila melanogaster</i>                           | UGD                    | <a href="#">O02373.1</a> | 37.53        |
|       | <i>Pseudomonas aeruginosa</i> PAO1                       | GMD                    | <a href="#">P11759.2</a> | 36.91        |
|       | <i>Homo sapiens</i>                                      | UGD                    | <a href="#">O60701.1</a> | 36.85        |
|       | <i>Pongo abelii</i>                                      | UGD                    | <a href="#">Q5R7B3.1</a> | 36.85        |
|       | <i>Bos taurus</i>                                        | UGD                    | <a href="#">P12378.2</a> | 36.64        |
|       | <i>Mus musculus</i>                                      | UGD                    | <a href="#">O70475.1</a> | 36.64        |
|       | <i>Oryza sativa</i> Japonica Group                       | UGD1                   | <a href="#">Q75GS4.1</a> | 36.46        |
|       | <i>Glycine max</i>                                       | UGD1                   | <a href="#">Q96558.1</a> | 36.23        |
|       | <i>Gallus gallus</i>                                     | UGD                    | <a href="#">Q5F3T9.1</a> | 36.23        |
|       | <i>Oryza sativa</i> Japonica Group                       | UGD2                   | <a href="#">B7F958.1</a> | 36.09        |
|       | <i>Rattus norvegicus</i>                                 | UGD                    | <a href="#">O70199.1</a> | 36.01        |
|       | <i>Arabidopsis thaliana</i>                              | UGD2                   | <a href="#">Q9LIA8.1</a> | 35.96        |

|                               |      |                          |       |
|-------------------------------|------|--------------------------|-------|
| <i>Arabidopsis thaliana</i>   | UGD3 | <a href="#">Q9LF33.1</a> | 35.73 |
| <i>Arabidopsis thaliana</i>   | UGD1 | <a href="#">Q9FZE1.1</a> | 35.39 |
| <i>Caenorhabditis elegans</i> | UGD  | <a href="#">Q19905.1</a> | 35.36 |
| <i>Arabidopsis thaliana</i>   | UGD4 | <a href="#">Q9FM01.1</a> | 35.31 |
| <i>Azotobacter vinelandii</i> | GMD  | <a href="#">P51585.1</a> | 35.08 |

**Table S3.** Results of blastp sequences search against UniProtKB/Swiss-Prot database ordered by the identity percentages obtained. Results with score <50 were removed to exclude enzymes that showed similarity with only one of the protein domains (*continuation*)

| Query            | Organism                                                               | Protein         | Access Number            | Identity (%) |
|------------------|------------------------------------------------------------------------|-----------------|--------------------------|--------------|
| ZmUGD<br>(cont.) | <i>Oryza sativa</i> Japonica Group                                     | UGD5            | <a href="#">Q2QS13.1</a> | 35.02        |
|                  | <i>Pseudomonas syringae</i> pv. <i>tomato</i> str. DC3000              | GMD             | <a href="#">Q887P8.1</a> | 34.99        |
|                  | <i>Oryza sativa</i> Japonica Group                                     | UGD3            | <a href="#">Q9AUV6.1</a> | 34.75        |
|                  | <i>Oryza sativa</i> Japonica Group                                     | UGD4            | <a href="#">Q2QS14.1</a> | 34.53        |
|                  | <i>Pseudomonas putida</i> KT2440                                       | GMD             | <a href="#">Q88NC4.1</a> | 33.18        |
|                  | <i>Pseudomonas syringae</i> pv. <i>syringae</i>                        | GMD             | <a href="#">P59793.1</a> | 32.60        |
|                  | <i>Escherichia coli</i> K5                                             | UGD             | <a href="#">Q47329.1</a> | 32.39        |
|                  | <i>Pseudomonas savastanoi</i> pv. <i>phaseolicola</i>                  | GMD             | <a href="#">O07299.1</a> | 31.56        |
|                  | <i>Escherichia coli</i> K-12                                           | UAMAD           | <a href="#">P27829.4</a> | 31.01        |
|                  | <i>Escherichia coli</i> O8:K40                                         | UGD             | <a href="#">Q33952.1</a> | 30.79        |
|                  | <i>Salmonella enterica</i> subsp. <i>enterica</i> serovar <i>Typhi</i> | UAMAD           | <a href="#">Q8Z389.1</a> | 30.66        |
|                  | <i>Salmonella enterica</i> subsp. <i>enterica</i> serovar              | UAMAD           | <a href="#">Q9L6R4.1</a> | 30.39        |
|                  | <i>Typhimurium</i> str. LT2                                            |                 |                          |              |
|                  | <i>Streptococcus pneumoniae</i>                                        | UGD             | <a href="#">Q57346.2</a> | 29.92        |
|                  | <i>Salmonella enterica</i> subsp. <i>enterica</i> serovar              | UGD             | <a href="#">Q04873.1</a> | 29.86        |
|                  | <i>Typhimurium</i> str. LT2                                            |                 |                          |              |
|                  | <i>Shigella flexneri</i>                                               | Putative<br>UGD | <a href="#">P37791.1</a> | 29.56        |
|                  | <i>Escherichia coli</i> O157:H7                                        | UGD             | <a href="#">Q7DBF9.1</a> | 29.21        |
|                  | <i>Escherichia coli</i> CFT073                                         | UGD             | <a href="#">Q8FG45.1</a> | 29.21        |
|                  | <i>Escherichia coli</i> K-12                                           | UGD             | <a href="#">P76373.1</a> | 29.21        |

|                                           |        |                          |       |
|-------------------------------------------|--------|--------------------------|-------|
| <i>Escherichia coli</i> O111:H-           | UGD    | <a href="#">Q04872.1</a> | 29.13 |
| <i>Methanococcus maripaludis</i> S2       | UAMAD  | <a href="#">Q6LZC3.1</a> | 28.70 |
| <i>Streptococcus pyogenes</i>             | UGD    | <a href="#">P0C0F4.1</a> | 28.57 |
| <i>Streptococcus pyogenes</i> serotype M1 | UGD    | <a href="#">P0C0F5.1</a> | 28.57 |
| <i>Methanococcus maripaludis</i> C7       | UAMAD  | <a href="#">A6VK13.1</a> | 28.47 |
| <i>Streptococcus pyogenes</i> SSI-1       | UGD    | <a href="#">P0DG69.1</a> | 28.30 |
| <i>Streptococcus pyogenes</i> MGAS315     | UGD    | <a href="#">P0DG68.1</a> | 28.30 |
| <i>Methanococcus maripaludis</i> C5       | UAMAD  | <a href="#">A4FY94.1</a> | 28.02 |
| <i>Ralstonia solanacearum</i> GMI1000     | NAGAAD | <a href="#">P58591.1</a> | 27.87 |

**Table S3.** Results of blastp sequences search against UniProtKB/Swiss-Prot database ordered by the identity percentages obtained. Results with score <50 were removed to exclude enzymes that showed similarity with only one of the protein domains (*continuation*)

| Query            | Organism                                                  | Protein | Access Number            | Identity (%) |
|------------------|-----------------------------------------------------------|---------|--------------------------|--------------|
| ZmUGD<br>(cont.) | <i>Yersinia pestis</i>                                    | UAMAD   | <a href="#">Q8ZAE4.1</a> | 27.85        |
|                  | <i>Methanocaldococcus jannaschii</i> DSM 2661             | UAMAD   | <a href="#">Q57871.1</a> | 27.52        |
|                  | <i>Ralstonia solanacearum</i>                             | NAGAAD  | <a href="#">Q45410.1</a> | 27.17        |
|                  | <i>Methanococcus vannielii</i> SB                         | UAMAD   | <a href="#">A6USK4.1</a> | 26.90        |
|                  | <i>Methanococcus aeolicus</i> Nankai-3                    | UAMAD   | <a href="#">A6UU98.1</a> | 26.09        |
|                  | <i>Pseudomonas aeruginosa</i> PAO1                        | UAGAD   | <a href="#">G3XD94.1</a> | 25.74        |
| LbjUGD           | <i>Escherichia coli</i> O111:H-                           | UGD     | <a href="#">Q04872.1</a> | 61.80        |
|                  | <i>Escherichia coli</i> O8:K40                            | UGD     | <a href="#">Q33952.1</a> | 61.56        |
|                  | <i>Escherichia coli</i> CFT073                            | UGD     | <a href="#">Q8FG45.1</a> | 60.34        |
|                  | <i>Escherichia coli</i> O157:H7                           | UGD     | <a href="#">Q7DBF9.1</a> | 60.10        |
|                  | <i>Escherichia coli</i> K-12                              | UGD     | <a href="#">P76373.1</a> | 59.85        |
|                  | <i>Salmonella enterica</i> subsp. <i>enterica</i> serovar | UGD     | <a href="#">Q04873.1</a> | 59.61        |
|                  | <i>Typhimurium</i> str. LT2                               |         |                          |              |
|                  | <i>Streptococcus pyogenes</i> serotype M1                 | UGD     | <a href="#">P0C0F5.1</a> | 57.77        |
|                  | <i>Streptococcus pyogenes</i> WF50                        | UGD     | <a href="#">P0C0F4.1</a> | 57.77        |
|                  | <i>Streptococcus pneumoniae</i>                           | UGD     | <a href="#">Q57346.2</a> | 57.66        |
|                  | <i>Escherichia coli</i> K5                                | UGD     | <a href="#">Q47329.1</a> | 57.63        |

|                                                          |            |                          |       |
|----------------------------------------------------------|------------|--------------------------|-------|
| <i>Streptococcus pyogenes</i> MGAS315                    | UGD        | <a href="#">P0DG68.1</a> | 57.52 |
| <i>Streptococcus pyogenes</i> SSI-1                      | UGD        | <a href="#">P0DG69.1</a> | 57.52 |
| <i>Shigella flexneri</i>                                 | Putative   | <a href="#">P37791.1</a> | 57.42 |
|                                                          | UGD        |                          |       |
| <i>Methanocaldococcus jannaschii</i> DSM 2661            | UGD        | <a href="#">Q58454.1</a> | 32.85 |
| <i>Rickettsia prowazekii</i> str. Madrid E               | UGD        | <a href="#">Q05973.1</a> | 30.42 |
| <i>Bacillus subtilis</i> subsp. <i>subtilis</i> str. 168 | UGD (YwqF) | <a href="#">P96718.1</a> | 30.03 |
| <i>Rickettsia bellii</i> RML369-C                        | UGD        | <a href="#">Q1RKf8.1</a> | 30.02 |
| <i>Rickettsia typhi</i> str. Wilmington                  | UGD        | <a href="#">Q68VX0.1</a> | 29.71 |
| <i>Bacillus subtilis</i> subsp. <i>subtilis</i> str. 168 | UGD (TuaD) | <a href="#">Q32271.1</a> | 29.64 |
| <i>Rickettsia felis</i> URRWXCal2                        | UGD        | <a href="#">Q4UK39.1</a> | 29.10 |
| <i>Sinorhizobium meliloti</i> 1021                       | UGD        | <a href="#">Q54068.2</a> | 29.06 |
| <i>Bacillus subtilis</i> subsp. <i>subtilis</i> str. 168 | Putative   | <a href="#">Q34862.1</a> | 28.76 |
|                                                          | UGD (YtcA) |                          |       |
| <i>Rickettsia conorii</i> str. Malish 7                  | UGD        | <a href="#">Q92GB1.1</a> | 28.46 |

**Table S3.** Results of blastp sequences search against UniProtKB/Swiss-Prot database ordered by the identity percentages obtained. Results with score <50 were removed to exclude enzymes that showed similarity with only one of the protein domains (*continuation*)

| Query         | Organism                                                  | Protein | Access Number            | Identity (%) |
|---------------|-----------------------------------------------------------|---------|--------------------------|--------------|
| <i>LbjUGD</i> | <i>Azotobacter vinelandii</i>                             | GMD     | <a href="#">P51585.1</a> | 28.39        |
| (cont.)       | <i>Pseudomonas syringae</i> pv. <i>Syringae</i>           | GMD     | <a href="#">P59793.1</a> | 28.00        |
|               | <i>Pseudomonas syringae</i> pv. <i>tomato</i> str. DC3000 | GMD     | <a href="#">Q887P8.1</a> | 27.93        |
|               | <i>Pseudomonas savastanoi</i> pv. <i>phaseolicola</i>     | GMD     | <a href="#">Q07299.1</a> | 27.76        |
|               | <i>Arabidopsis thaliana</i>                               | UGD4    | <a href="#">Q9FM01.1</a> | 27.11        |
|               | <i>Caenorhabditis elegans</i>                             | UGD     | <a href="#">Q19905.1</a> | 27.03        |
|               | <i>Pseudomonas aeruginosa</i> PAO1                        | GMD     | <a href="#">P11759.2</a> | 26.77        |
|               | <i>Bacillus licheniformis</i> DSM 13 = ATCC 1458          | GPD     | <a href="#">Q65I16.1</a> | 26.53        |
|               | <i>Rattus norvegicus</i>                                  | UGD     | <a href="#">Q70199.1</a> | 26.51        |
|               | <i>Homo sapiens</i>                                       | UGD     | <a href="#">Q60701.1</a> | 26.51        |
|               | <i>Bos taurus</i>                                         | UGD     | <a href="#">P12378.2</a> | 26.51        |

|       |                                    |                                  |                          |       |
|-------|------------------------------------|----------------------------------|--------------------------|-------|
|       | <i>Pseudomonas aeruginosa</i> PAO1 | UGD                              | <a href="#">O86422.2</a> | 26.37 |
|       | <i>Haloferax volcanii</i> DS2      | UGD (AglM)                       | <a href="#">D4GYH5.1</a> | 26.32 |
|       | <i>Pongo abelii</i>                | UGD                              | <a href="#">Q5R7B3.1</a> | 26.25 |
|       | <i>Mus musculus</i>                | UGD                              | <a href="#">O70475.1</a> | 26.25 |
|       | <i>Pseudomonas putida</i> KT2440   | GMD                              | <a href="#">Q88NC4.1</a> | 25.85 |
|       | <i>Drosophila melanogaster</i>     | UGD                              | <a href="#">O02373.1</a> | 25.39 |
|       | <i>Staphylococcus aureus</i>       | UGD/GMD<br>superfamily<br>(CapL) | <a href="#">P39861.1</a> | 25.24 |
| ChUGD | <i>Bos taurus</i>                  | UGD                              | <a href="#">P12378.2</a> | 99.80 |
|       | <i>Homo sapiens</i>                | UGD                              | <a href="#">O60701.1</a> | 98.38 |
|       | <i>Pongo abelii</i>                | UGD                              | <a href="#">Q5R7B3.1</a> | 98.18 |
|       | <i>Mus musculus</i>                | UGD                              | <a href="#">O70475.1</a> | 96.36 |
|       | <i>Rattus norvegicus</i>           | UGD                              | <a href="#">O70199.1</a> | 96.15 |
|       | <i>Gallus gallus</i>               | UGD                              | <a href="#">Q5F3T9.1</a> | 92.51 |
|       | <i>Drosophila melanogaster</i>     | UGD                              | <a href="#">O02373.1</a> | 68.55 |
|       | <i>Caenorhabditis elegans</i>      | UGD                              | <a href="#">Q19905.1</a> | 65.87 |
|       | <i>Glycine max</i>                 | UGD1                             | <a href="#">Q96558.1</a> | 61.75 |
|       | <i>Arabidopsis thaliana</i>        | UGD4                             | <a href="#">Q9FM01.1</a> | 61.75 |

**Table S3.** Results of blastp sequences search against UniProtKB/Swiss-Prot database ordered by the identity percentages obtained. Results with score <50 were removed to exclude enzymes that showed similarity with only one of the protein domains (*continuation*)

| Query   | Organism                           | Protein | Access Number            | Identity (%) |
|---------|------------------------------------|---------|--------------------------|--------------|
| ChUGD   | <i>Oryza sativa</i> Japonica Group | UGD5    | <a href="#">Q2QS13.1</a> | 61.44        |
| (cont.) | <i>Arabidopsis thaliana</i>        | UGD2    | <a href="#">Q9LIA8.1</a> | 61.32        |
|         | <i>Arabidopsis thaliana</i>        | UGD1    | <a href="#">Q9FZE1.1</a> | 61.31        |
|         | <i>Arabidopsis thaliana</i>        | UGD3    | <a href="#">Q9LF33.1</a> | 61.11        |
|         | <i>Oryza sativa</i> Japonica Group | UGD4    | <a href="#">Q2QS14.1</a> | 61.02        |
|         | <i>Oryza sativa</i> Japonica Group | UGD2    | <a href="#">B7F958.1</a> | 60.98        |
|         | <i>Oryza sativa</i> Japonica Group | UGD3    | <a href="#">Q9AUV6.1</a> | 60.81        |



|                                                           |            |                          |       |
|-----------------------------------------------------------|------------|--------------------------|-------|
| <i>Oryza sativa</i> Japonica Group                        | UGD1       | <a href="#">Q75GS4.1</a> | 59.75 |
| <i>Sinorhizobium meliloti</i> 1021                        | UGD        | <a href="#">O54068.2</a> | 37.96 |
| <i>Bacillus subtilis</i> subsp. <i>subtilis</i> str. 168  | UGD (YwqF) | <a href="#">P96718.1</a> | 35.42 |
| <i>Methanocaldococcus jannaschii</i> DSM 2661             | UGD        | <a href="#">Q58454.1</a> | 35.38 |
| <i>Bacillus subtilis</i> subsp. <i>subtilis</i> str. 168  | UGD (TuaD) | <a href="#">O32271.1</a> | 34.77 |
| <i>Haloferax volcanii</i> DS2                             | UGD (AglM) | <a href="#">D4GYH5.1</a> | 34.68 |
| <i>Pseudomonas aeruginosa</i> PAO1                        | UGD        | <a href="#">O86422.2</a> | 32.70 |
| <i>Rickettsia conorii</i> str. Malish 7                   | UGD        | <a href="#">Q92GB1.1</a> | 32.54 |
| <i>Rickettsia felis</i> URRWXCal2                         | UGD        | <a href="#">Q4UK39.1</a> | 32.47 |
| <i>Rickettsia typhi</i> str. Wilmington                   | UGD        | <a href="#">Q68VX0.1</a> | 32.47 |
| <i>Rickettsia prowazekii</i> str. Madrid E                | UGD        | <a href="#">O05973.1</a> | 32.40 |
| <i>Rickettsia bellii</i> RML369-C                         | UGD        | <a href="#">Q1RKF8.1</a> | 32.26 |
| <i>Bacillus subtilis</i> subsp. <i>subtilis</i> str. 168  | Putative   | <a href="#">O34862.1</a> | 31.29 |
|                                                           | UGD (YtcA) |                          |       |
| <i>Pseudomonas syringae</i> pv. <i>syringae</i>           | GMD        | <a href="#">P59793.1</a> | 29.17 |
| <i>Pseudomonas syringae</i> pv. <i>tomato</i> str. DC3000 | GMD        | <a href="#">Q887P8.1</a> | 29.09 |
| <i>Pseudomonas savastanoi</i> pv. <i>phaseolicola</i>     | GMD        | <a href="#">O07299.1</a> | 28.91 |
| <i>Azotobacter vinelandii</i>                             | GMD        | <a href="#">P51585.1</a> | 28.68 |
| <i>Pseudomonas aeruginosa</i> PAO1                        | GMD        | <a href="#">P11759.2</a> | 27.98 |
| <i>Shigella flexneri</i>                                  | Putative   | <a href="#">P37791.1</a> | 27.82 |
|                                                           | UGD        |                          |       |
| <i>Salmonella enterica</i> subsp. <i>enterica</i> serovar | UGD        | <a href="#">Q04873.1</a> | 27.72 |
| <i>Typhimurium</i> str. LT2                               |            |                          |       |

**Table S3.** Results of blastp sequences search against UniProtKB/Swiss-Prot database ordered by the identity percentages obtained. Results with score <50 were removed to exclude enzymes that showed similarity with only one of the protein domains (*continuation*)

| Query   | Organism                            | Protein | Access Number            | Identity (%) |
|---------|-------------------------------------|---------|--------------------------|--------------|
| ChUGD   | <i>Methanococcus maripaludis</i> C7 | UAMAD   | <a href="#">A6VK13.1</a> | 27.47        |
| (cont.) | <i>Escherichia coli</i> O8:K40      | UGD     | <a href="#">O33952.1</a> | 27.37        |

|                                                                        |                                       |                          |       |
|------------------------------------------------------------------------|---------------------------------------|--------------------------|-------|
| <i>Methanococcus maripaludis</i> S2                                    | UAMAD                                 | <a href="#">Q6LZC3.1</a> | 27.25 |
| <i>Escherichia coli</i> O111:H-                                        | UGD                                   | <a href="#">Q04872.1</a> | 27.25 |
| <i>Methanocaldococcus jannaschii</i> DSM 2661                          | UAMAD                                 | <a href="#">Q57871.1</a> | 27.21 |
| <i>Pseudomonas putida</i> KT2440                                       | GMD                                   | <a href="#">Q88NC4.1</a> | 27.08 |
| <i>Methanococcus aeolicus</i> Nankai-3                                 | UAMAD                                 | <a href="#">A6UU98.1</a> | 26.87 |
| <i>Methanococcus vannielii</i> SB                                      | UAMAD                                 | <a href="#">A6USK4.1</a> | 26.82 |
| <i>Escherichia coli</i> K5                                             | UGD                                   | <a href="#">Q47329.1</a> | 26.53 |
| <i>Escherichia coli</i> O157:H7                                        | UGD                                   | <a href="#">Q7DBF9.1</a> | 26.36 |
| <i>Methanococcus maripaludis</i> C5                                    | UAMAD                                 | <a href="#">A4FY94.1</a> | 26.18 |
| <i>Escherichia coli</i> CFT073                                         | UGD                                   | <a href="#">Q8FG45.1</a> | 26.09 |
| <i>Escherichia coli</i> K-12                                           | UGD                                   | <a href="#">P76373.1</a> | 26.09 |
| <i>Pyrococcus horikoshii</i> OT3                                       | UAMAD                                 | <a href="#">Q59284.1</a> | 25.74 |
| <i>Streptococcus pneumoniae</i>                                        | UGD                                   | <a href="#">Q57346.2</a> | 25.68 |
| <i>Salmonella enterica</i> subsp. <i>enterica</i> serovar <i>Typhi</i> | UGD/GMD<br>superfamily<br>(VipA/TviB) | <a href="#">Q04972.1</a> | 23.79 |

Enzyme abbreviations: UGD, uridine diphosphate(UDP)-glucose 6-dehydrogenase; GMD, guanosine diphosphate(GDP)-mannose 6-dehydrogenase; UAMAD, UDP-N-acetyl-D-mannosamine dehydrogenase; UAGAD, UDP-N-acetylglucosamine 6-dehydrogenase; and NAGAAD, nucleoside diphosphate(NDP)-N-acetyl-D-galactosaminuronic acid dehydrogenase.

| NAD-binding domain |                                                                 |                       |
|--------------------|-----------------------------------------------------------------|-----------------------|
| Lajo               | -MNSYKIAVAGTGYVG---LSLATLLSQHNEVTAVDIVPEKVDLINNHKSPFIVDKIEIDF   | 56                    |
| Cahi               | MFEIKKICCIAGAGYVGGPTCSVIAHMCPEIRVTVVDINESRINAWNPTLPITYEPGLKEV   | 60                    |
| Zymo               | ----MRITMTIGSGYVG---LVSGACFSDFGHNVICVDHDQEKIALLQKGVMPITYEPGLADM | 54                    |
|                    | :* :*:*** *                                                     |                       |
| NAD-binding domain |                                                                 |                       |
| Lajo               | LANKD--LNLKATDAESAYKDAADFVIIATPTNYDSE---KNFFDTSAVEAVIKLVKQY     | 110                   |
| Cahi               | VESCR-GKNLFFSTNIDDAIKEADLVFISVNTPTKTYGMKGRAADLKYEACARRIVQN      | 119                   |
| Zymo               | VANNVKAGRLSFSNDLASSVKNADAVFIAVGTPSRRG---DGHADLSYVFAAAKEIAAS     | 110                   |
|                    | : . :.* :.: :.*:*** *:*:.. *                                    |                       |
| NAD-binding domain |                                                                 |                       |
| Lajo               | NPQA-IMIISTIPVGYTNHVRKEFE-----TENIIFSPEFLREGHALYDNLHPSRIV       | 162                   |
| Cahi               | SHGYKIVTEKSTVPVRAAESIRRIFDANTKPNLNLQVLSNPEFLAEGTAIKDLKNPDRVL    | 179                   |
| Zymo               | VSDNTVVVDKSTVPVGTGDEVERIIREIAPDK-KIIVASNPEFLREGAALIGDFKRPDRIV   | 169                   |
|                    | : : ***:*** : : : : . : .**** ** *: * :.*:..                    |                       |
| NAD-binding domain |                                                                 | Central domain        |
| Lajo               | VGTDK---ENTKLVEAAHTFASLLQEGAEDKDIATLFGMGTAEAVKLFANTYLALRVSY     | 219                   |
| Cahi               | IGGETPEQGQRAVQALCAVYEHWP-----REKILTNTWSSELSKLTANAFLAQRIS        | 233                   |
| Zymo               | IGTENP---EAREIMQEIYRPLYLN-----QSPILFTSRRSALIKYASNAFLATKITF      | 220                   |
|                    | :* : :                                                          | : . :.* ** *:***: : : |
| Central domain     |                                                                 |                       |
| Lajo               | FNELDTYAESKGLNTQEIIDGVGLDPRIGSHYNNPSFGYGGYCLPKDTKQLLANYKDV--    | 277                   |
| Cahi               | INSISALCEATGADVEEVATAIGMDQRIGSKFLKASVFGGSCFQKDVNLVYLCEALNL      | 293                   |
| Zymo               | INEMADLCEAVGGDVQDIARGIGADNRIGSKFLHAGPGYGGSCFPKDTLALLKTAENF--    | 278                   |
|                    | :*. : .*: * :.: : .*: * ****: : .*.*** *: **.* : .              |                       |
| Central domain     |                                                                 |                       |
| Lajo               | --PENLIEAIVKSNDRKDFIADQVLSKAGYYDYDDNNTYDPSEEQVITGVYRLTMKSN      | 335                   |
| Cahi               | PEVARYWQQVIDMNDYQRRRFASRIIDSLFNT-----VTDKKIAILGFQAFKKD          | 341                   |
| Zymo               | ATPLRVVESVVTANNIRKRAMARKVLQAIQKD-----MRGQKIGLLGLTFKPN           | 326                   |
|                    | . : : : * : : : * : : .                                         | :.*: :*** :           |
| UDP-binding domain |                                                                 |                       |
| Lajo               | SDNFRQSSVQGVMKRVKAKGAKIIFEPFLENGSTF-----                        | 371                   |
| Cahi               | TGDTRESSSIYISKYLMDEGAHLHIYDPKVPREQIVVDLSHPGVSKDDQVARLVITSKDP    | 401                   |
| Zymo               | TDDMRDAPSLALIQGLEDAIIHAYDEGMTQ---ARPLLPNVIF-----EDEF            | 373                   |
|                    | :. : *: : : : : ** : : *                                        |                       |
| UDP-binding domain |                                                                 |                       |
| Lajo               | -----FGSEVVNDLDEFKNKSDAIIAN-----RYNTILDDVKDKVYTRDIFRKD          | 415                   |
| Cahi               | YEACDGAHAVVICTEWDMFKELDYERIHKMKLPAFIFDGRRLVDGLHNELQTIGFQIET     | 461                   |
| Zymo               | YKVAEKAELVIVTEWDAFRALDLKRIAGLLKTP-LLLDLRNIYTE--EEAKKAGLVYHG     | 430                   |
|                    | . : : * *: . *                                                  | : : : : : . : . : .   |
| Lajo               | -----                                                           | 415                   |
| Cahi               | IGKKVSSKRIPYAPSGEIPKFSLQDMPNKKPRV                               | 494                   |
| Zymo               | IGRPNAG-----                                                    | 437                   |

**Figure S1.** Multiple amino acid sequence alignment of the three uridine diphosphate (UDP)-glucose dehydrogenases used in this study generated by Clustal Omega (1.2.4) (EMBL-EBI). Species are abbreviated as the first two letters of the genus followed by the two first letters of the species: Lajo, *Lactobacillus johnsonii*; Cahi, *Capra hircus*; and Zymo, *Zymomonas mobilis*. An asterisk (\*) marks the residues that are conserved in the three sequences; a colon (:) indicates conservation between groups of strongly similar properties (scoring > 0.5 in the Gonnet Point Accepted Mutation (PAM) 250

matrix); and a period (.) indicates conservation between groups of weakly similar properties (scoring  $\leq 0.5$  in the Gonnet PAM 250 matrix). Conserved amino acids within 63 members of UDP-glucose 6-dehydrogenase/ guanosine diphosphate (GDP)-mannose 6-dehydrogenase (UGD/GMD) superfamily are highlighted in grey while conserved sites within only UGD enzymes are highlighted in yellow. The nicotinamide adenine dinucleotide (NAD)-binding domain contains a characteristic dinucleotide binding Rossman fold, indicated in a blue box, composed by a conserved glycine-rich phosphate-binding loop with the pattern GXGXXG linking the first  $\beta$ -sheet to the following  $\alpha$ -helix that, in the case of UGD/GMD dehydrogenase enzymatic family, has a strictly conserved tyrosine so that the region becomes GXGYXG. The central domain is a long  $\alpha$ -helical region that serves as the dimerization interface for these enzymes. The C-terminal substrate-binding domain forms an incomplete dinucleotide binding fold, primarily responsible for binding the UDP moiety of the UDP-sugar in a deep pocket. The described active site of UGD contains residues from the three domains that are highly conserved within the superfamily and include: N-terminal threonine (T<sub>122</sub>), central  $\alpha$ -helix lysine, (K<sub>207</sub>), and asparagine, (N<sub>211</sub>) and C-terminal contributes with cysteine (C<sub>263</sub>) and aspartic acid (D<sub>267</sub>) (reference sites from *Z. mobilis* sequence)

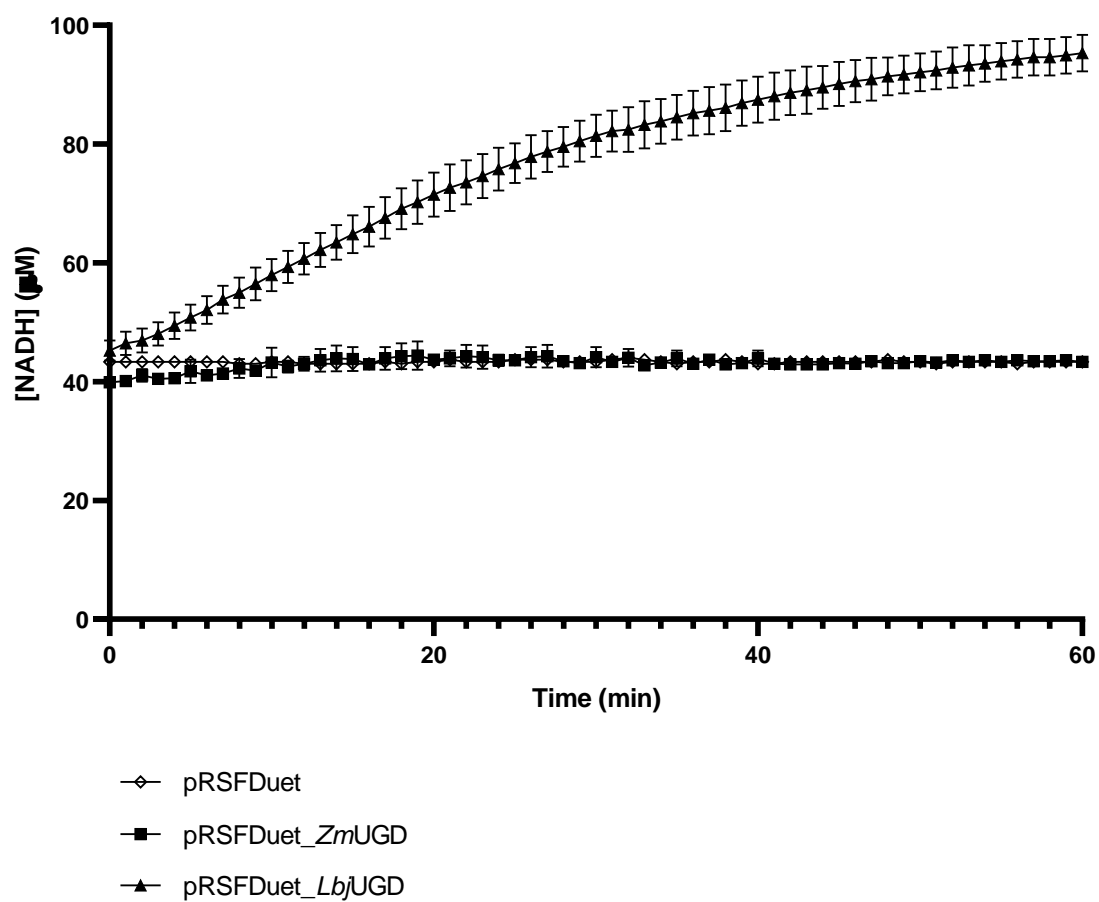

**Figure S2.** *In vitro* reduced nicotinamide adenine dinucleotide (NADH) production over time in engineered *Escherichia coli* at pH 7.2 as obtained by monitoring absorbance at 340 nm.

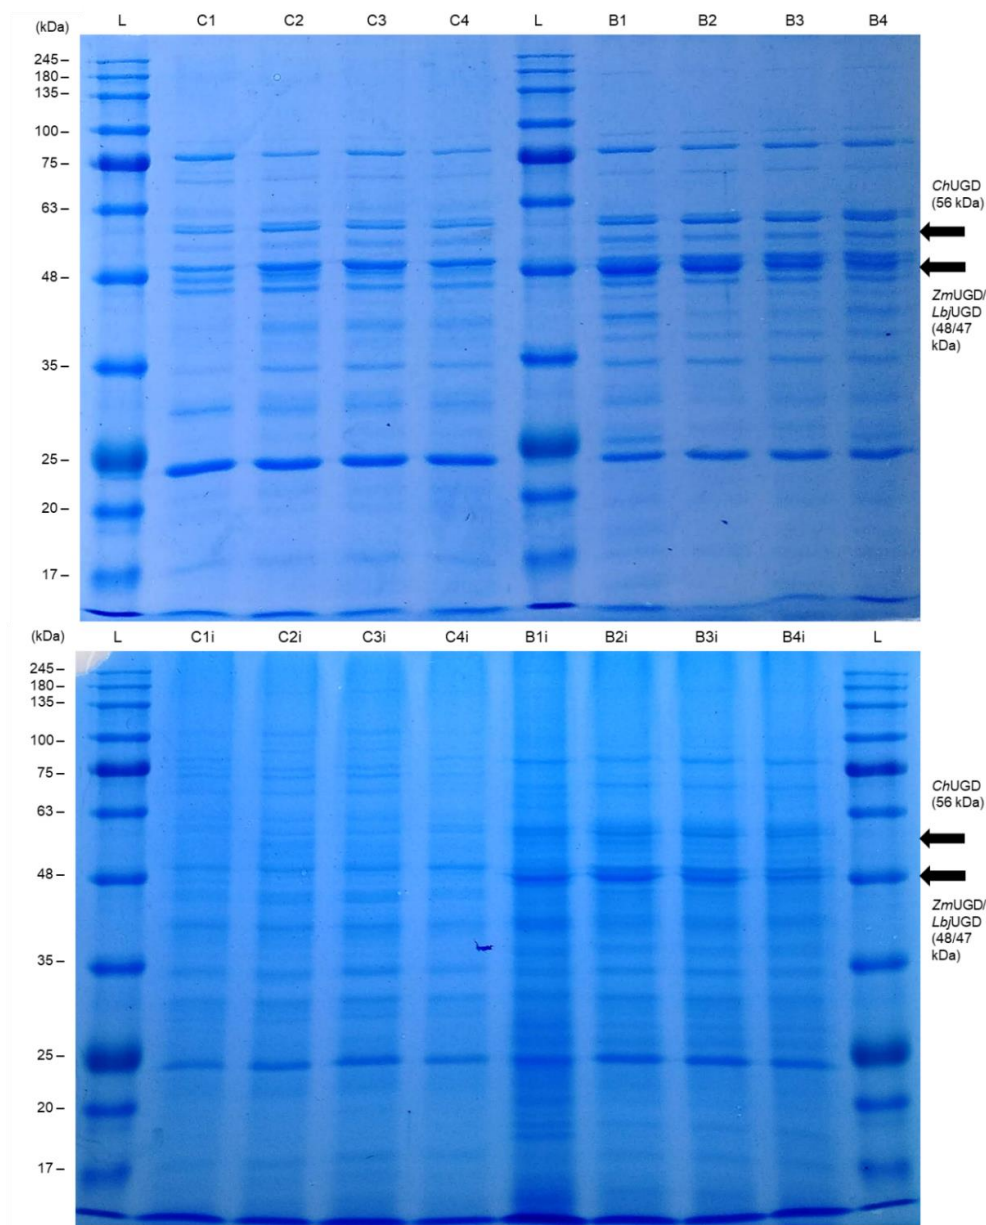

**Figure S3.** Sodium dodecyl sulfate polyacrylamide gel electrophoresis (SDS-PAGE) gels from *Saccharomyces cerevisiae* cell extracts (15 µg). In the upper gel, the samples loaded were: cell extract from *S. cerevisiae* CEN.PK2-1C wild-type (C1), cell extract from *S. cerevisiae* CEN.PK2-1C expressing *ChUGD* (C2) cell extract from *S. cerevisiae* CEN.PK2-1C expressing *ZmUGD* (C3), cell extract from *S. cerevisiae* CEN.PK2-1C expressing *LbjUGD* (C4), *S. cerevisiae* BY4741 wild-type (B1), *S. cerevisiae* BY4741 expressing *ChUGD* (B2), *S. cerevisiae* BY4741 expressing *ZmUGD* (B3) and *S. cerevisiae* BY4741 expressing *LbjUGD* (B4). The lower gel shows the proteins in the corresponding insoluble phases. L: NZYColour Protein Marker II ladder.

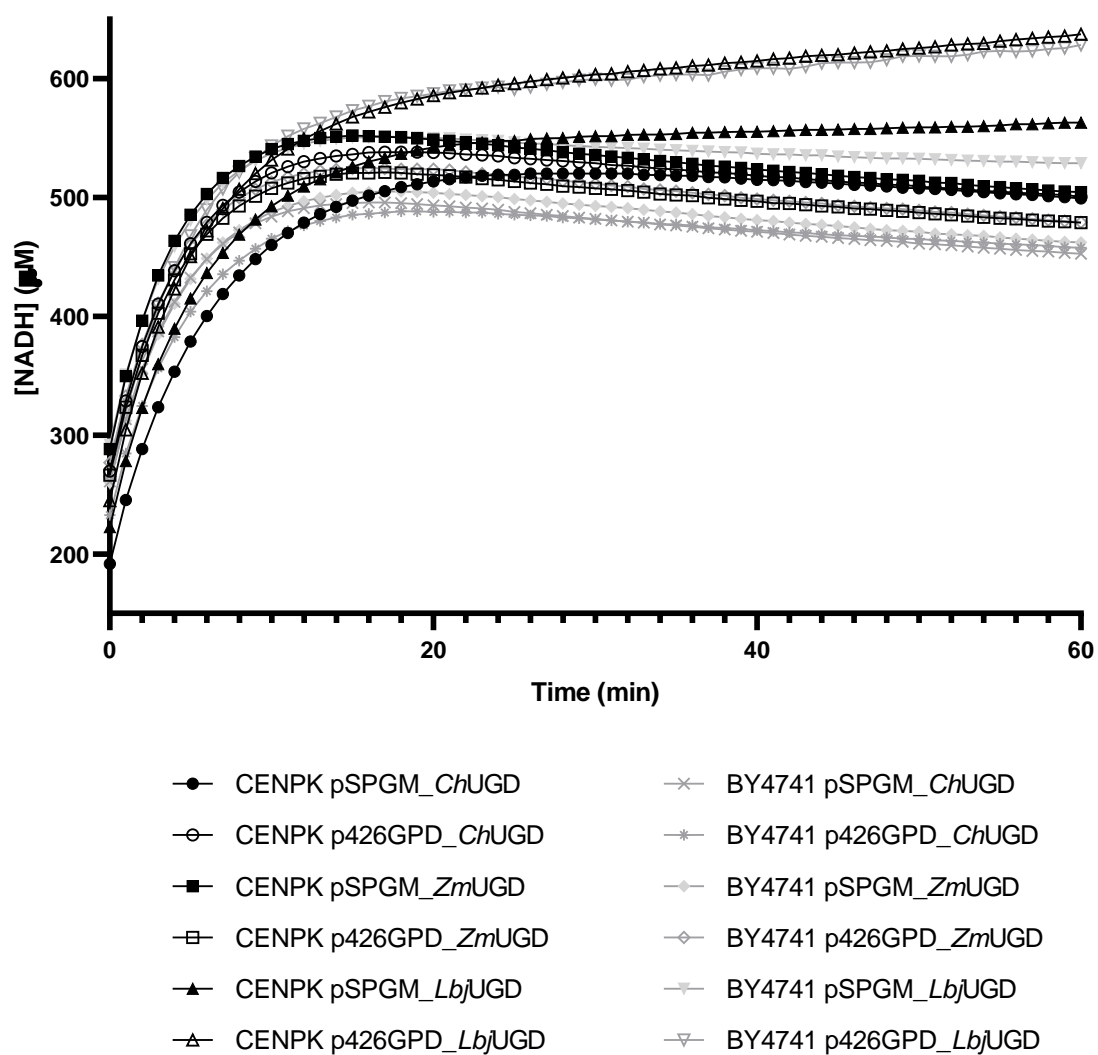

**Figure S4.** *In vitro* reduced nicotinamide adenine dinucleotide (NADH) production over time in engineered *S. cerevisiae* yeasts at pH 9.2 obtained by monitoring absorbance at 340 nm.
